# Supplementary material
Source: publisher figshare collection journal article supplement (https://acs.figshare.com/ndownloader/files/4146715)
Supplement: Supplementary file 1 [file 4146715]

## Supporting Information

# Quantitative Evaluation of Adhesion of Osteosarcoma Cells to Hydrophobic Polymer Substrate with Tunable Elasticity

*Hiroshi Y. Yoshikawa,<sup>1,2</sup> Jing Cui,<sup>3</sup> Karl Kratz,<sup>3</sup> Takahisa Matsuzaki,<sup>2</sup> Seiichiro Nakabayashi,<sup>2</sup>*

*Astrid Marx,<sup>4</sup> Ulrike Engel,<sup>4</sup> Andreas Lendlein,<sup>3\*</sup> Motomu Tanaka<sup>1,5\*</sup>*

<sup>1</sup>Physical Chemistry of Biosystems, Institute of Physical Chemistry, University of Heidelberg, 69120 Heidelberg, Germany

<sup>2</sup>Department of Chemistry, Saitama University, 338-8570 Saitama, Japan

<sup>3</sup>Centre for Biomaterial Development and Berlin-Brandenburg Center for Regenerative Therapies, Institute of Polymer Research, Helmholtz-Zentrum Geesthacht, 14513 Teltow, Germany

<sup>4</sup>Nikon Imaging Center at the University of Heidelberg, BIOQUANT, 69120 Heidelberg, Germany

<sup>5</sup>Cell Biophysics Group, Institute for Toxicology and Genetics, Karlsruhe Institute of Technology, 76131 Karlsruhe, Germany

\*Author to whom correspondence should be addressed: Tel: +49-(0)-6221-544916, Fax: +49-(0)-6221-544918, tanaka@uni-heidelberg.de and andreas.lendlein@hzg.de

### **Dependence of indentation depth on the calculated Young's modulus of cPnBA substrate.**

The apparent Young's modulus,  $E$ , of cPnBA films were calculated from  $f-i$  curves using the modified Hertz model, which assumes the contact between a cone with infinitely small apex and a flat surface. The calculated  $E$  value decays with the increase in indentation depth and shows convergence (Figure S1). This asymptotic behavior of  $E$  is because, in a small indentation region ( $< 100$  nm), the AFM tip has relatively larger contact to cPnBA film surface compared to the contact the Hertz model assumes due to the cantilever tip radius ( $\sim 10$  nm). In this work, the  $E$  values which have difference of  $< 10\%$  from the estimated convergence given by exponential functions are taken as the apparent Young's modulus of cPnBA films.

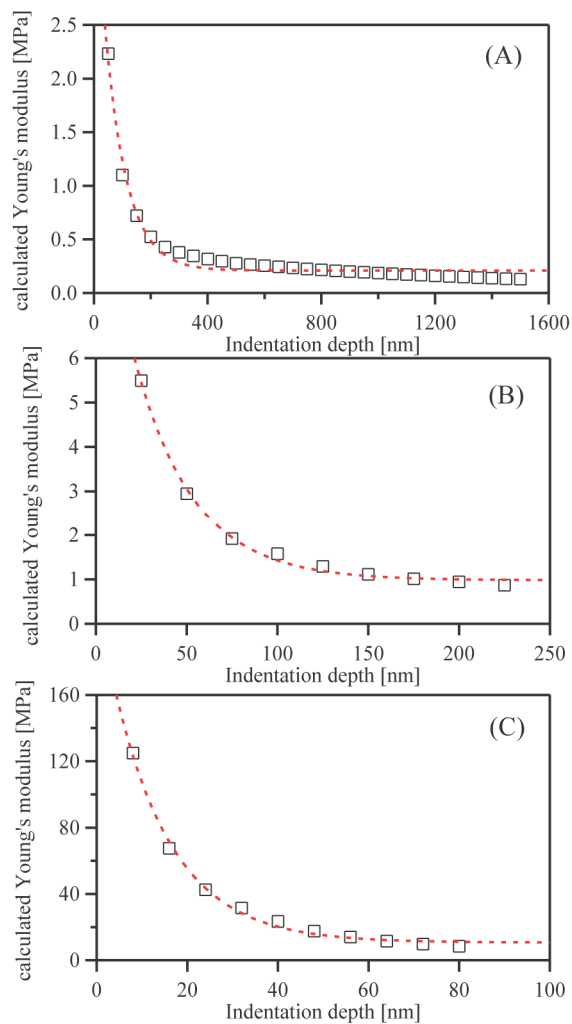

Figure S1: Dependence of indentation depth on the calculated Young's modulus of (A) S1, (B) S3, and (C) S5 samples in air. The dotted lines are given as a guide to the eye.
